# Supplementary material for: A user task design notation for improved software design
Source: PeerJ Comput Sci. 2021 May 24;7:e503. doi: 10.7717/peerj-cs.503 (PMC8156997; doi:10.7717/peerj-cs.503)
Supplement: Supplemental Information 1 [file peerj-cs-07-503-s001.pdf]

## QUESTIONNAIRE ABOUT UML-ADE DESIGN

*Some expressions about UML-ADE diagram that you currently worked on are given below. About these expressions choose one of the five alternatives (from 1 to 5).*

|                                                                                                          | <b>STRONGLY<br/>1 NOT AGREE</b> | <b>2 NOT AGREE</b>       | <b>3 DON' T KNOW</b>     | <b>4 AGREE</b>           | <b>5 STRONGLY<br/>AGREE</b> |
|----------------------------------------------------------------------------------------------------------|---------------------------------|--------------------------|--------------------------|--------------------------|-----------------------------|
| 1. I think UML-ADE diagram given to us is easy to understand.                                            | <input type="checkbox"/>        | <input type="checkbox"/> | <input type="checkbox"/> | <input type="checkbox"/> | <input type="checkbox"/>    |
| 2. How complicated is the given UML-ADE diagram, evaluate from 1 to 5 (1: very easy - 5: very difficult) | <input type="checkbox"/>        | <input type="checkbox"/> | <input type="checkbox"/> | <input type="checkbox"/> | <input type="checkbox"/>    |
| 3. I think I understand the system very well by looking to the given UML-ADE.                            | <input type="checkbox"/>        | <input type="checkbox"/> | <input type="checkbox"/> | <input type="checkbox"/> | <input type="checkbox"/>    |
| 4. What is your opinion or suggesstions about UML-ADE design or intelligibility?                         |                                 |                          |                          |                          |                             |
|                                                                                                          |                                 |                          |                          |                          |                             |
|                                                                                                          |                                 |                          |                          |                          |                             |
|                                                                                                          |                                 |                          |                          |                          |                             |

5. If you design the Collection Spheres in the Room game (1. Scenario), how can you design? Draw.

6. If you design the Catching Spheres in the Box game (2. Scenario), how can you design? Draw.
