# Supplementary material for: A user task design notation for improved software design
Source: PeerJ Comput Sci. 2021 May 24;7:e503. doi: 10.7717/peerj-cs.503 (PMC8156997; doi:10.7717/peerj-cs.503)
Supplement: Supplemental Information 3 [file peerj-cs-07-503-s003.xls]

## Sheet: questionnaire_AD
ID	Group: 1: (AD), 2: (ADE)	Q1: I think UML-AD diagram given to us is easy to understand.	Q2: How complicated is the given UML-AD diagram, evaluate from 1 to 5 (1: very easy - 5: very difficult)	Q3: I think I understand the system very well by looking to the given UML-AD	Q4: What is your opinion or suggesstions about UML-AD design or intelligibility?	Q5: If you design the Collection Spheres in the Room game (Scenario-1), how can you design? Draw.	Q6: If you design the Catching Spheres in the Box game (Scenario-2), how can you design? Draw.
080308028	1	4	2	5
100308205	1	2	3	5
100302001	1	3	2	3	If the grouping of diagrams is more detailed, it will be easier to understand.
110308113	1	3	3	5	I found it very successful.	4	1
100309013	1	5	1	5	It was fine.
110308012	1	3	3	4		2	2
040302125	1	1	2	1		2	1
100308206	1	3	3	3
100302034	1
090302059	1	3	3	3
080309017	1	2	3	2
090302007	1	1	3	2
100302006	1
100309002	1	2	4	3	It can be explained in a little more simple manner.	3	2
080308027	1	4	2	3		3	3
080309025	1
050308023	1	3	3	3
080302109	1	3	3	4	I think it would be better if there were more errors in relationships rather than typos.
120302021	1	5	3	4
100302012	1	3	2	4
100302004	1
50308039	1	1	5	2
70309014	1	2	5	1
110308013	1	3	3	4
80309023	1	4	4	3	UML-AD action transitions need to be explained in a little more simple and understandable words.
70302045	1	4	2	5
110308007	1	4	2	2	UML is easy but it is hard for me to understand the text of the script. The text should be written more clearly, using bullets (item by item).
70309017	1	5	1	4
100302002	1	5	2	5	The application is very useful for the active use of perceptions.
100302007	1	4	3	4
70302003	1	4	2	4		2	3
90309019	1	2	5	2
90302004	1	1	1	3
80308006	1	3	3	3	The second diagram [for Scenario-2] was fine, less complicated, a little more logical.	1	1
70309028	1

## Sheet: questionnaire_ADE
ID	Group: 1: (AD), 2: (ADE)	Q1:I think UML-ADE diagram given to us is easy to understand.	Q2: How complicated is the given UML-ADE diagram, evaluate from 1 to 5 (1: very easy - 5: very difficult)	Q3: I think I understand the system very well by looking to the given UML-ADE.	Q4: What is your opinion or suggesstions about UML-ADE design or intelligibility?	Q5: If you design the Collection Spheres in the Room game (Scenario-1), how can you design? Draw.	Q6: If you design the Catching Spheres in the Box game (Scenario-2), how can you design? Draw.
100302049	2	5	2	5
060302071	2	5	2	5	I found it understandable enough. I did not face any problems during the construction phase	3	2
100302005	2	3	2	4		1	1
080302020	2	5	3	5
090308016	2	3	3	3
100308001	2	4	3	3
090302506	2	3	3	3
070302023	2	5	3	5
100309003	2	2	3	4		5	5
090302069	2	5	5	5
110308024	2	3	3	3	The diagram seems complicated, I think if the symbols could be a little more discrete and regular, it might be more understandable.	1
100308015	2	3	2	4	The text [Scenario Requirement Document] is not much clear.
110302017	2	4	3	2	Correct use of the stimulating qualities of colors may contribute to the understanding of the diagram.
090302003	2	4	2	4	[The design is] Simple and straightforward. Complex operations may cause it to be unreadable.	1	2
090302041	2
080308029	2	4	2	4
100302014	2	2	2	1
090308020	2	4	3	4	It can be drawn including more details.	4	2
100308004	2	5	2	5
080302067	2	4	3	3		2	0
110308001	2	4	2	4
110309001	2
080302033	2	3	2	5	[The diagram] is designed clearly.	3	4
100302023	2	4	1	4		1
110309101	2	4	2	4
110308103	2	5	3	4
110308004	2	4	1	3
90302037	2	3	3	4	[Based on the scenario] Game [scenario] is comprised of only the spheres, that’s why it is boring. It would be better and more interesting with a more realistic scenario.
90302001	2	4	2	4	The diagram is clear to understand.
80309022	2	4	2	4
80308053	2	5	1	3
80309001	2	4	2	4	Since the event flows are mixed up in the diagram, as a suggestion, it is good to number the user actions that are performed in order.
70308028	2	5	2	5
70309020	2	4	2	5
100308023	2	1	3	2	In order to make the diagram more understandable, the actor's work should be expressed in a different way [representation], not a double circle, they can be confused in more complex/large scenarios.
70309028	2
70309028	2	2	5	2
