# Supplementary material for: A user task design notation for improved software design
Source: PeerJ Comput Sci. 2021 May 24;7:e503. doi: 10.7717/peerj-cs.503 (PMC8156997; doi:10.7717/peerj-cs.503)
Supplement: Supplemental Information 4 [file peerj-cs-07-503-s004.xls]

## Sheet: ALL
course code	ID	Group: 1: (AD), 2: (ADE)	Dd1j	Dd2j	Dd3j	Dd4j	Dd5j		Od1j	Od2j	Od3j	Od4j	Od5j	Number of Defects detected	1	2	3	4	5	PARTICIPANT PERFORMANCE	Dd1j	Dd2j	Dd3j	Dd4j	Dd5j		Od1j	Od2j	Od3j	Od4j	Od5j	Number of Defects detected	1	2	3	4	5	PARTICIPANT PERFORMANCE	Verilen UML-ADE Diyagramını kolay ve anlaşılabilir buldum.	Verilen UML-ADE sizce ne kadar karışıktı, 1-5 arasında değerlendiriniz (1: az karışık - 5: çok karışık)	Verilen diyagrama bakarak geliştirilecek oyunu çok iyi anladığımı düşünüyorum.	UML-ADE diyagramın tasarımı ya da anlaşılabilirliği ile ilgili eklemek istedikleriniz / önerileriniz nelerdir?
341	080308028	1	30	26	6	3	24		1	2	4	3	5	5	2734.2	1679.79	1054.46	1600.79	1868.75	1	31			36			1			5		2	712.83	0	0	1168.7	0	0.141263	4	2	5
341	100308205	1		26	66	314				1	2	3		3	0	1679.79	1054.46	1600.79	0	0.485013	66		192				1		3			2	712.83	0	1784.87	0	0	0.187524	2	3	5
341	100302001	1	108	133	52		105		1	2	3		5	4	2734.2	1679.79	1054.46	0	1868.75	0.820901	131	14	135	108			2	1	3	4		4	712.83	2964.2	1784.87	1168.7	0	0.497816	3	2	3	Diyagramların grup grup ayrılması daha ayrıntılı olursa daha kolay anlaşılır
341	110308113	1				106						4		1	0	0	0	1600.79	0	0.179099	36			104			1			2		2	712.83	0	0	1168.7	0	0.141263	3	3	5	Çok başarılı buldum.	4	1
341	100309013	1				305						1		1	0	0	0	1600.79	0	0.179099												0	0	0	0	0	0	0	5	1	5	Gayet güzeldi.
341	110308012	1			420	101					1	2		2	0	0	1054.46	1600.79	0	0.297074	186			56			1			2		2	712.83	0	0	1168.7	0	0.141263	3	3	4		2	2
341	040302125	1				32						3		1	0	0	0	1600.79	0	0.179099	27			33			1			2		2	712.83	0	0	1168.7	0	0.141263	1	2	1		2	1
341	100308206	1			167	276					2	3		2	0	0	1054.46	1600.79	0	0.297074			157						1			1	0	0	1784.87	0	0	0.134006	3	3	3
341	100302034	1	365				48		1				5	2	2734.2	0	0	0	1868.75	0.514987		2		70				1		3		2	0	2964.2	0	1168.7	0	0.310292
341	090302059	1		246	521	464				1	2	3		3	0	1679.79	1054.46	1600.79	0	0.485013	150		63				1		2			2	712.83	0	1784.87	0	0	0.187524	3	3	3
341	080309017	1	232	58	20	483	27		4	5	2	1	3	5	2734.2	1679.79	1054.46	1600.79	1868.75	1	42		72		5		2		3		1	3	712.83	0	1784.87	0	6688.78	0.689708	2	3	2
341	090302007	1	30	31	105				1	3	2			3	2734.2	1679.79	1054.46	0	0	0.611822	45			30	40		2			3	4	3	712.83	0	0	1168.7	6688.78	0.643446	1	3	2
341	100302006	1												0	0	0	0	0	0	0												0	0	0	0	0	0	0
341	100309002	1		1028						1				1	0	1679.79	0	0	0	0.187939	679		679		679		1		2		3	3	712.83	0	1784.87	0	6688.78	0.689708	2	4	3	Biraz daha basit dille anlatılabilir.	3	2
341	080308027	1					28						2	1	0	0	0	0	1868.75	0.209079		105	186	37	177			3	2	4	5	4	0	2964.2	1784.87	1168.7	6688.78	0.946482	4	2	3		3	3
341	080309025	1	370		129	218	40		1		2	3	5	4	2734.2	0	1054.46	1600.79	1868.75	0.812061												0	0	0	0	0	0	0
341	050308023	1		298	119					1	3			2	0	1679.79	1054.46	0	0	0.305914		129		6				2		1		2	0	2964.2	0	1168.7	0	0.310292	3	3	3
341	080302109	1	5	3	5				3	1	2			3	2734.2	1679.79	1054.46	0	0	0.611822	2			1	1		1			4	3	3	712.83	0	0	1168.7	6688.78	0.643446	3	3	4	Bence yazım hataları yerine ilişkilerde daha çok hata olsa daha iyi olurdu.
341	120302021	1	3		184	26	207		1		3	2	4	4	2734.2	0	1054.46	1600.79	1868.75	0.812061	224		45	315	358		1		2	3	4	4	712.83	0	1784.87	1168.7	6688.78	0.777452	5	3	4
341	100302012	1												0	0	0	0	0	0	0												0	0	0	0	0	0	0	3	2	4
341	100302004	1				71						1		1	0	0	0	1600.79	0	0.179099			99						2			1	0	0	1784.87	0	0	0.134006
341	50308039	1		350						1				1	0	1679.79	0	0	0	0.187939												0	0	0	0	0	0	0	1	5	2
341	70309014	1				650						1		1	0	0	0	1600.79	0	0.179099	1185						1					1	712.83	0	0	0	0	0.0535183	2	5	1
376	110308013	1		164	67		143			2	3		1	3	0	1679.79	1054.46	0	1868.75	0.514993	71		96	52			1		3	2		3	712.83	0	1784.87	1168.7	0	0.275268	3	3	4
376	80309023	1				152						1		1	0	0	0	1600.79	0	0.179099	95	317		74			1	2		3		3	712.83	2964.2	0	1168.7	0	0.36381	4	4	3	UML-AD eylem geçişlerinin biraz daha basit ve anlaşılabilirliği yüksek kelimelerle anlatılması gerekiyor.
376	70302045	1			62	40	52				1	2	3	3	0	0	1054.46	1600.79	1868.75	0.506154		313	165					3	2			2	0	2964.2	1784.87	0	0	0.356554	4	2	5
376	110308007	1					235						2	1	0	0	0	0	1868.75	0.209079	1			63			1			2		2	712.83	0	0	1168.7	0	0.141263	4	2	2	UML kolay da senaryonun metnini anlamakta zorlanıyorum. Maddeler halinde daha açık yazılabilir.
376	70309017	1	468		74	511			3		1	2		3	2734.2	0	1054.46	1600.79	0	0.602982	161		145				1		2			2	712.83	0	1784.87	0	0	0.187524	5	1	4
376	100302002	1		128	181	199	189			1	3	2	3	4	0	1679.79	1054.46	1600.79	1868.75	0.694092	46		82	81			1		2	3		3	712.83	0	1784.87	1168.7	0	0.275268	5	2	5	Uygulama algıların aktif kullanımı için oldukça yararlı
376	100302007	1		153	126	170				1	2	3		3	0	1679.79	1054.46	1600.79	0	0.485013	92	267	141				1	3	2			3	712.83	2964.2	1784.87	0	0	0.410072	4	3	4
376	70302003	1	249	42	22	185	104		5	3	2	1	4	5	2734.2	1679.79	1054.46	1600.79	1868.75	1	90	56			165		1	2			3	3	712.83	2964.2	0	0	6688.78	0.77825	4	2	4		2	3
376	90309019	1												0	0	0	0	0	0	0	26			247			1			2		2	712.83	0	0	1168.7	0	0.141263	2	5	2
376	90302004	1		429	328	15	131			1	3	4	2	4	0	1679.79	1054.46	1600.79	1868.75	0.694092	630	512		361			2	1		4		3	712.83	2964.2	0	1168.7	0	0.36381	1	1	3
376	80308006	1			24	283					2	1		2	0	0	1054.46	1600.79	0	0.297074	409						2					1	712.83	0	0	0	0	0.0535183	3	3	3	2. diyagram iyidi, daha az karışık, biraz daha mantıklıydı.	1	1
376	70309028	1												0	0	0	0	0	0	0												0	0	0	0	0	0	0
	Average of Dj		186	207.667	133.9	219.238	102.538	Opnj (sum of orders)	21	26	45	46	44								192.391	190.556	161.214	98.4706	203.571	Opnj (sum of orders)	28	18	31	49	23
								Oj (avg)	2.1	1.73333	2.25	2.19048	3.38462													Oj (avg)	1.21739	2	2.21429	2.88235	3.28571
								Rj	10	15	20	21	13													Rj	23	9	14	17	7
								Sj (Rj/ all)	0.142857	0.214286	0.285714	0.3	0.185714													Sj (Rj/ all)	0.328571	0.128571	0.2	0.242857	0.1
								S01-AD	d1	d2	d3	d4	d5													S02-AD	d1	d2	d3	d4	d5
								DFj (Dj*Oj / Sj)	2734.2	1679.79	1054.46	1600.79	1868.75	8937.99												DFj (Dj*Oj / Sj)	712.83	2964.2	1784.87	1168.7	6688.78	13319.4
341	100302049	2		136	119	157	158			2	5	4	3	4	0	1276.33	746.569	914.813	817.192	0.759776	101		65	100			1		2	3		3	426.964	0	941.116	1335.59	0	0.370466	5	2	5
341	060302071	2	40		11	156	50		5		3	2	1	4	1187.22	0	746.569	914.813	817.192	0.741744	13	41	127	S	24		1	4	3	2	5	5	426.964	1679.87	941.116	1335.59	2914.48	1	5	2	5	Yeterince anlaşılır buldum. Yapım aşamasında herhangi bir sorun yaşamadım	3	2
341	100302005	2			66	2	1				3	2	1	3	0	0	746.569	914.813	817.192	0.50152	128	281		23			1	4		2		3	426.964	1679.87	0	1335.59	0	0.471693	3	2	4		1	1
341	080302020	2	13	386	65		33		5	1	2		4	4	1187.22	1276.33	746.569	0	817.192	0.814895	110		110				1		2			2	426.964	0	941.116	0	0	0.187459	5	3	5
341	090308016	2												0	0	0	0	0	0	0												0	0	0	0	0	0	0	3	3	3
341	100308001	2	147	149	54	133			4	1	2	3		4	1187.22	1276.33	746.569	914.813	0	0.834648	96	108		52			1	2		3		3	426.964	1679.87	0	1335.59	0	0.471693	4	3	3
341	090302506	2			227	565					2	3		2	0	0	746.569	914.813	0	0.336168			150						1			1	0	0	941.116	0	0	0.128955	3	3	3
341	070302023	2		243	3	3	24			4	1	2	3	4	0	1276.33	746.569	914.813	817.192	0.759776		42	51	65	151			2	1	4	3	4	0	1679.87	941.116	1335.59	2914.48	0.941496	5	3	5
341	100309003	2			215	45	149				2	3	1	3	0	0	746.569	914.813	817.192	0.50152	183	42	335				2	4	5			3	426.964	1679.87	941.116	0	0	0.417641	2	3	4		5	5
341	090302069	2	388	40	38	51			1	2	3	4		4	1187.22	1276.33	746.569	914.813	0	0.834648	144						1					1	426.964	0	0	0	0	0.0585041	5	5	5
341	110308024	2		249		79	65			2		3	4	3	0	1276.33	0	914.813	817.192	0.608714	179	115			171		1	3			2	3	426.964	1679.87	0	0	2914.48	0.688038	3	3	3	Diyagram birbirine girmiş durumda, eğer semboller biraz daha ayrık ve düzenli olabilse, daha anlaşılır olabilir diye düşünüyorum.	1
341	100308015	2		36	343	93	120			1	2	3	4	4	0	1276.33	746.569	914.813	817.192	0.759776	1			41	1		1			4	3	3	426.964	0	0	1335.59	2914.48	0.640863	3	2	4	Cümleler çok da anlaşılabilir değil
341	110302017	2	4	443	164	19			1	2	3	4		4	1187.22	1276.33	746.569	914.813	0	0.834648	28						1					1	426.964	0	0	0	0	0.0585041	4	3	2	Renklerin uyarıcı niteliklerinin doğru bir şekilde kullanılması diyagramın anlaşılabilirliğine katkıda bulunabilir.
341	090302003	2		1	1		1		3		2		3	3	1187.22	0	746.569	0	817.192	0.556639	193				260		3				4	2	426.964	0	0	0	2914.48	0.457856	4	2	4	Basit ve sade olmuş, karmaşık işlemler okunmaz hale getirilebilir.	1	2
341	090302041	2	275	41	49	192	184		1	2	3	4	5	5	1187.22	1276.33	746.569	914.813	817.192	1			42	93	67				1	2	3	3	0	0	941.116	1335.59	2914.48	0.711314
341	080308029	2				707						2		1	0	0	0	914.813	0	0.185105												0	0	0	0	0	0	0	4	2	4
341	100302014	2												0	0	0	0	0	0	0												0	0	0	0	0	0	0	2	2	1
341	090308020	2		421	38	186	53			1	3	2	4	4	0	1276.33	746.569	914.813	817.192	0.759776	643	178			111		1	4			3	3	426.964	1679.87	0	0	2914.48	0.688038	4	3	4	Daha detaylandırarak açık bir şekilde çizilebilir.	4	2
341	100308004	2	89	154	201	150	149		2	1	4	3	5	5	1187.22	1276.33	746.569	914.813	817.192	1	131	119					1	3				2	426.964	1679.87	0	0	0	0.288686	5	2	5
341	080302067	2												0	0	0	0	0	0	0												0	0	0	0	0	0	0	4	3	3		2	0
341	110308001	2	56	206		73			2	1		3		3	1187.22	1276.33	0	914.813	0	0.683585	118		100	107	283		1		3	5	4	4	426.964	0	941.116	1335.59	2914.48	0.769818	4	2	4
341	110309001	2	141		259						2		1	2	0	0	746.569	0	817.192	0.316415			233		1		1		2			2	426.964	0	941.116	0	0	0.187459
341	080302033	2	267	319	146	2			1	2	3	4		4	1187.22	1276.33	746.569	914.813	0	0.834648	52	65	19	18	27		1	2	3	4	5	5	426.964	1679.87	941.116	1335.59	2914.48	1	3	2	5	Anlaşılır şekilde yapılmış. Daha iyisi olur muydu sorusuna kesinlikle hayır diyorum.	3	4
341	100302023	2			121	40					3	2		2	0	0	746.569	914.813	0	0.336168	46	250		33			1	4		2		3	426.964	1679.87	0	1335.59	0	0.471693	4	1	4		1
341	110309101	2		80	75	240	25			1	3	2	4	4	0	1276.33	746.569	914.813	817.192	0.759776							2	3	1	4		4	426.964	1679.87	941.116	1335.59	0	0.600648	4	2	4
341	110308103	2	75	180	210	140	70		1	3	2	4	5	5	1187.22	1276.33	746.569	914.813	817.192	1	150	210	265		120		1	3	2		4	4	426.964	1679.87	941.116	0	2914.48	0.816993	5	3	4
376	110308004	2	152				27		3				2	2	1187.22	0	0	0	817.192	0.405576	27	256					1	2				2	426.964	1679.87	0	0	0	0.288686	4	1	3
376	90302037	2	37		337	12	70		1		2	3	4	4	1187.22	0	746.569	914.813	817.192	0.741744	135	162	34	70	300		1	2	3	4	5	5	426.964	1679.87	941.116	1335.59	2914.48	1	3	3	4	Oyun sadece küreler üzerinden anlatıldığı için sıkıcı, daha gerçekçi bir senaryo ile sıkıcılıktan uzaklaşılabilir
376	90302001	2	11		16	5	210		3		1	2	4	4	1187.22	0	746.569	914.813	817.192	0.741744	37	19	35	12			1	3	2	4		4	426.964	1679.87	941.116	1335.59	0	0.600648	4	2	4	Diyagram gayet anlaşılır
376	80309022	2	143	252	136	2	9		4	5	2	3	1	5	1187.22	1276.33	746.569	914.813	817.192	1	15		247	135	73		1		4	3	2	4	426.964	0	941.116	1335.59	2914.48	0.769818	4	2	4
376	80308053	2		145	208	182				1	2	3		3	0	1276.33	746.569	914.813	0	0.594424	78		123	415	652		1		3	5	4	4	426.964	0	941.116	1335.59	2914.48	0.769818	5	1	3
376	80309001	2			50	46	87				1	2	3	3	0	0	746.569	914.813	817.192	0.50152	120		136				1		2			2	426.964	0	941.116	0	0	0.187459	4	2	4	Diyagramda olay akışları karıştığı için sırayla yapılan kullanıcı actionlarına sayı verilmesi iyi olur.
376	70308028	2			38	64	148				1	2	3	3	0	0	746.569	914.813	817.192	0.50152			28						1			1	0	0	941.116	0	0	0.128955	5	2	5
376	70309020	2												0	0	0	0	0	0	0	250	164	85				1	3	2			3	426.964	1679.87	941.116	0	0	0.417641	4	2	5
376	100308023	2	148	150	215	162	188		5	1	3	2	4	5	1187.22	1276.33	746.569	914.813	817.192	1	849	209	131	144			1	4	3	5		4	426.964	1679.87	941.116	1335.59	0	0.600648	1	3	2	Diyagramın daha anlaşılır olması açısından oyuncunun yağtığı işleri çift daire değil, farklı bir şekilde ifade edilmeli, büyük senaryolarda bunlar karışabilir.
376	70309028	2	219	123		308			1	3		4		3	1187.22	1276.33	0	914.813	0	0.683585	268	229	337	206	113		1	3	2	4	5	5	426.964	1679.87	941.116	1335.59	2914.48	1
376	70309028	2	43	75	38	73	15		1	4	3	2	5	5	1187.22	1276.33	746.569	914.813	817.192	1	102	109	80	56			1	5	2	3		4	426.964	1679.87	941.116	1335.59	0	0.600648	2	5	2
	Average of Dj		124.889	182.333	122.964	134.034	83.4545	Opnj (sum of orders)	44	40	68	82	74								155.444	144.389	130.143	98.125	156.933	Opnj (sum of orders)	33	60	50	63	52
								Oj (avg)	2.44444	2	2.42857	2.82759	3.21739													Oj (avg)	1.13793	3.15789	2.27273	3.5	3.71429
								Rj	18	20	28	29	23													Rj	29	19	22	18	14
								Sj (Rj/ all)	0.257143	0.285714	0.4	0.414286	0.328571													Sj (Rj/ all)	0.414286	0.271429	0.314286	0.257143	0.2
								S01-ADE	d1	d2	d3	d4	d5													S02-ADE	d1	d2	d3	d4	d5
								DFj (Dj*Oj / Sj)	1187.22	1276.33	746.569	914.813	817.192	4942.12												DFj (Dj*Oj / Sj)	426.964	1679.87	941.116	1335.59	2914.48	7298.02
AD:	35
ADE:	35
