# Supplementary figures and images for: A user task design notation for improved software design
Source: PeerJ journal article supplement (doi:10.7717/peerj-cs.503), 2021-05-24

## UML-ADE MODEL USED FOR SCENARIO 2

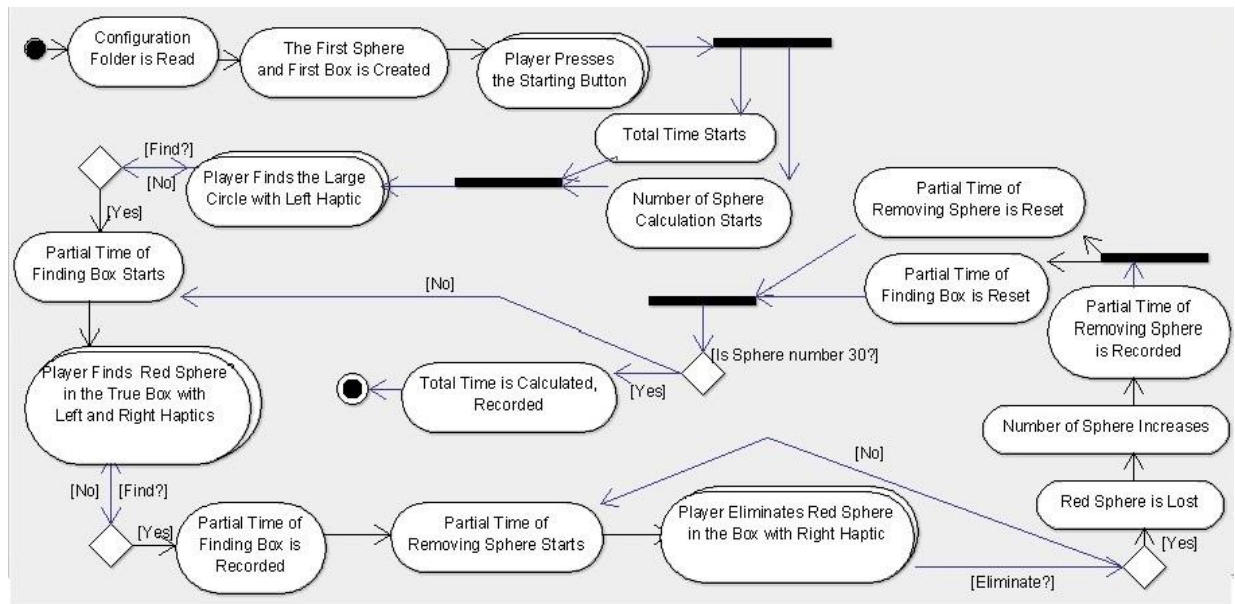

Supplement: Supplementary_Material.zip [file Supplementary_Material.zip]

## UML-ADE MODEL USED FOR SCENARIO 1

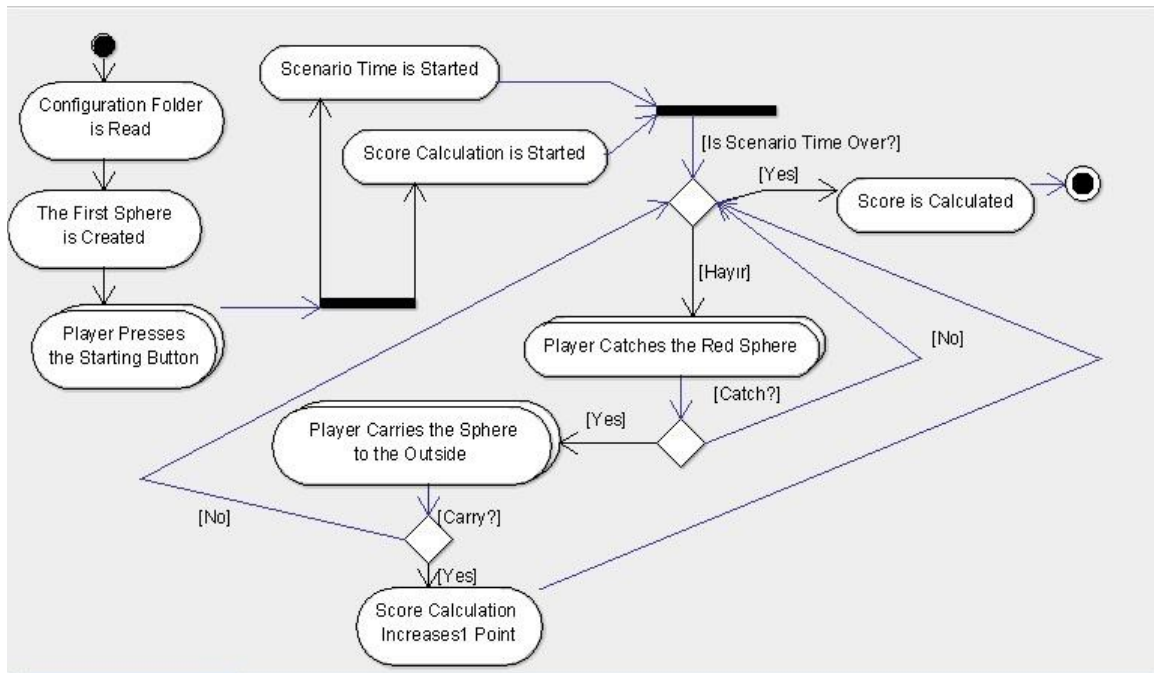

Supplement: Supplementary_Material.zip [file Supplementary_Material.zip]

## UML-AD MODEL USED FOR SCENARIO 1

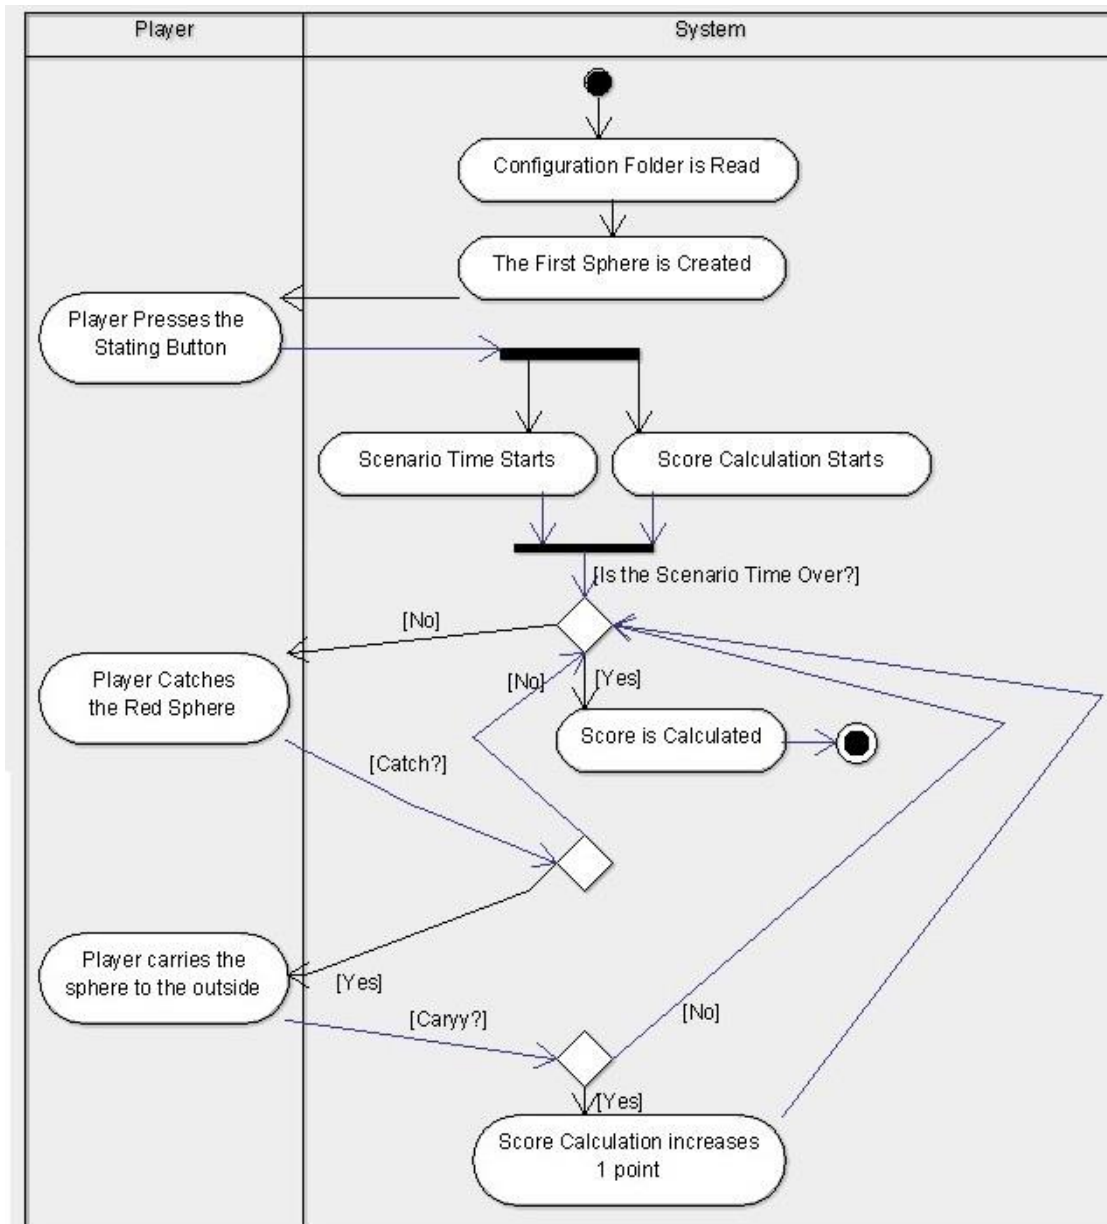

Supplement: Supplementary_Material.zip [file Supplementary_Material.zip]

## UML-AD MODEL USED FOR SCENARIO 2

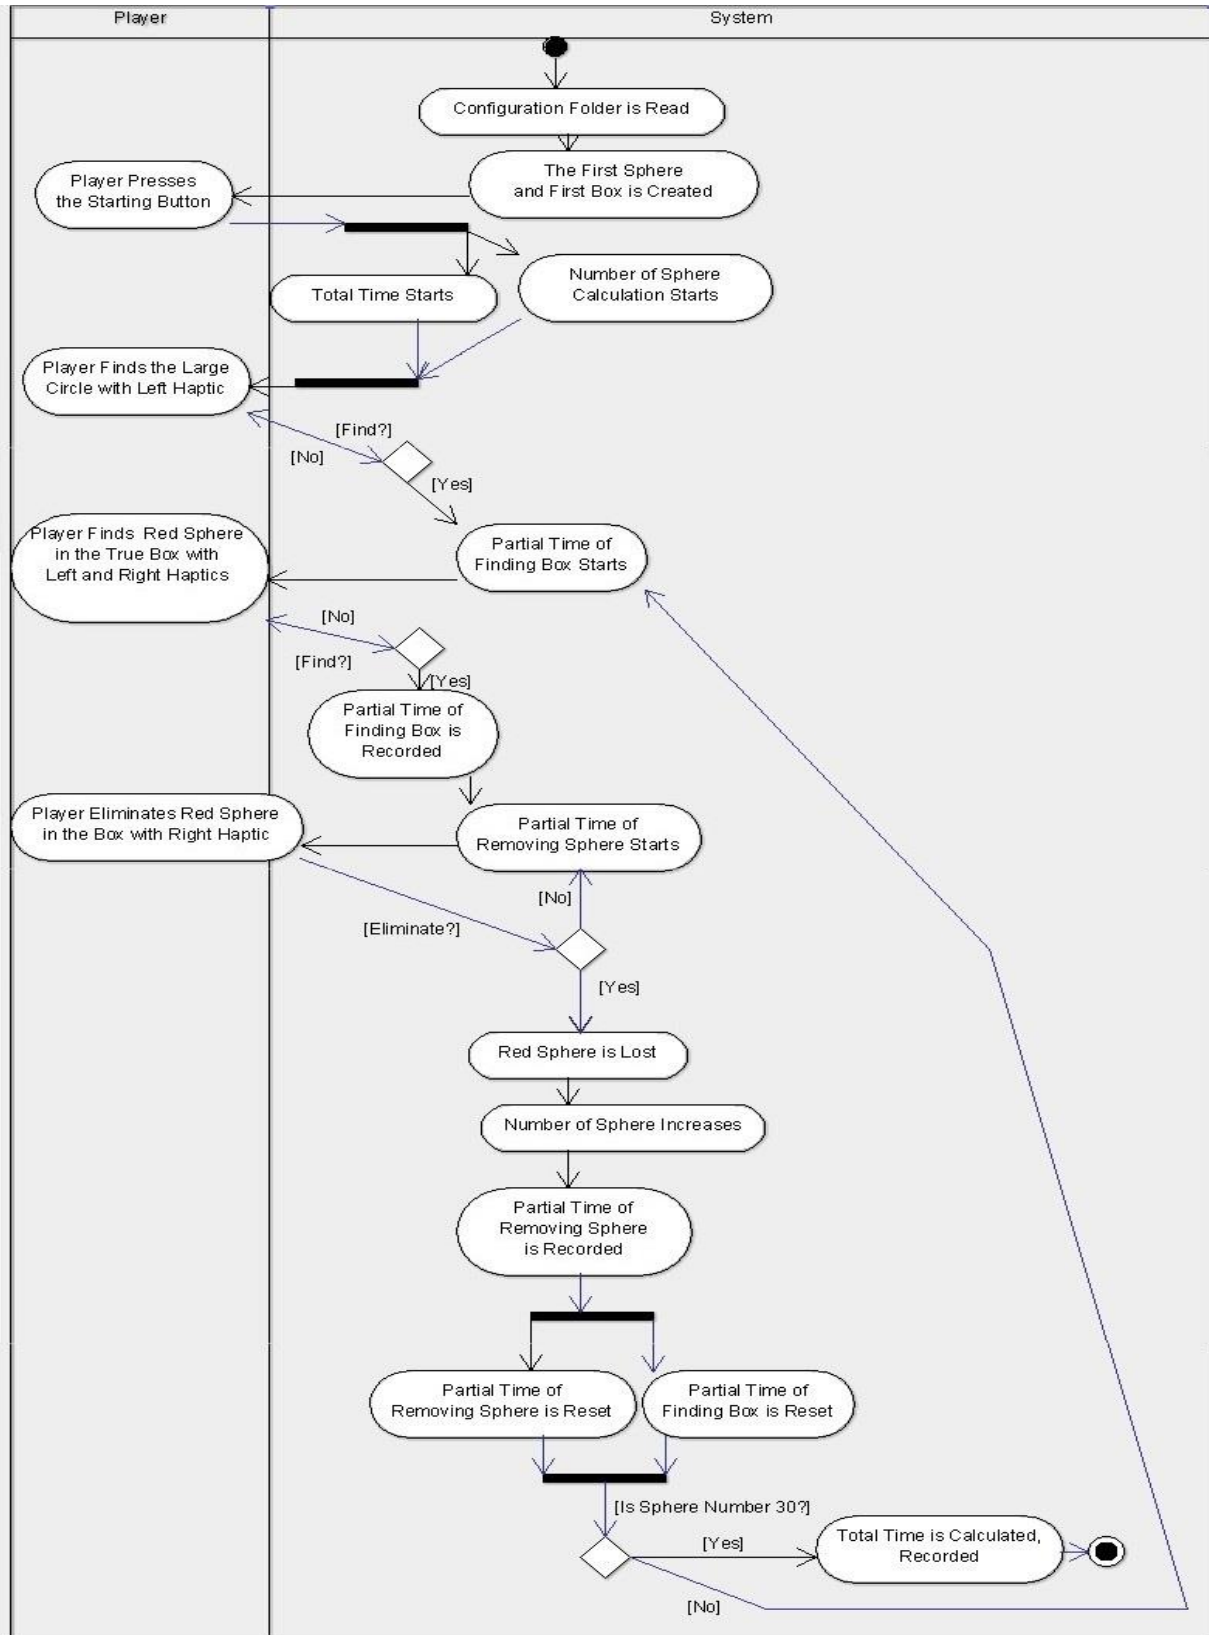

Supplement: Supplementary_Material.zip [file Supplementary_Material.zip]
